# Supplementary material
Source: PubMed Central journal article supplement (PMC3876261)

# Supporting Information

Vono et al. 10.1073/pnas.1319784110

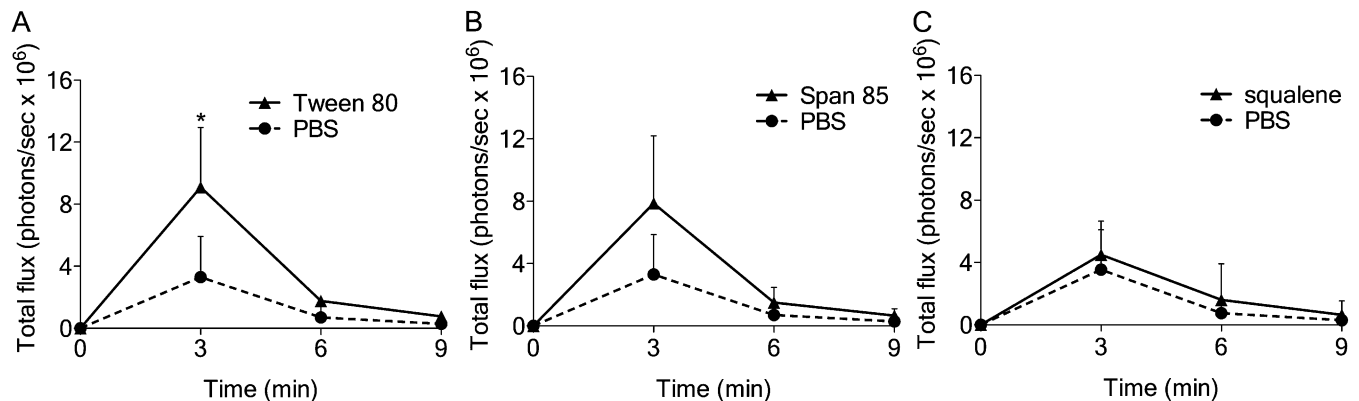

Fig. S1. The two surfactants, Tween 80 and Span 85, are responsible for MF59-induced ATP release. (A–C) Quantitative analyses of chemiluminescence emission over time (number of photons per second in the region of interest). (A) Tween 80 (0.5%), (B) Span 85 (0.5%), (C) squalene (5% vol/vol). Data show mean values + SD from at least four independent experiments. Unpaired, two-tailed Student's *t* test (T): \**P* < 0.05.

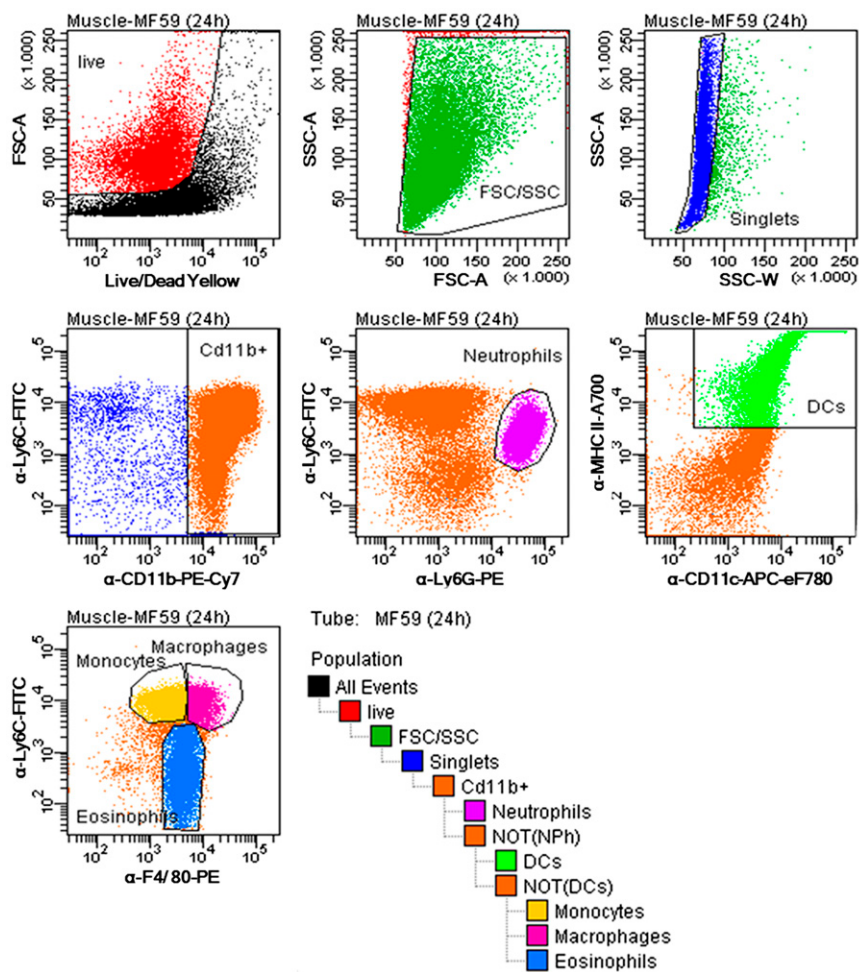

Fig. S2. Gating strategy of muscle-derived cells. Muscle single cell suspensions were prepared and analyzed by FACS, applying the depicted gating strategy.



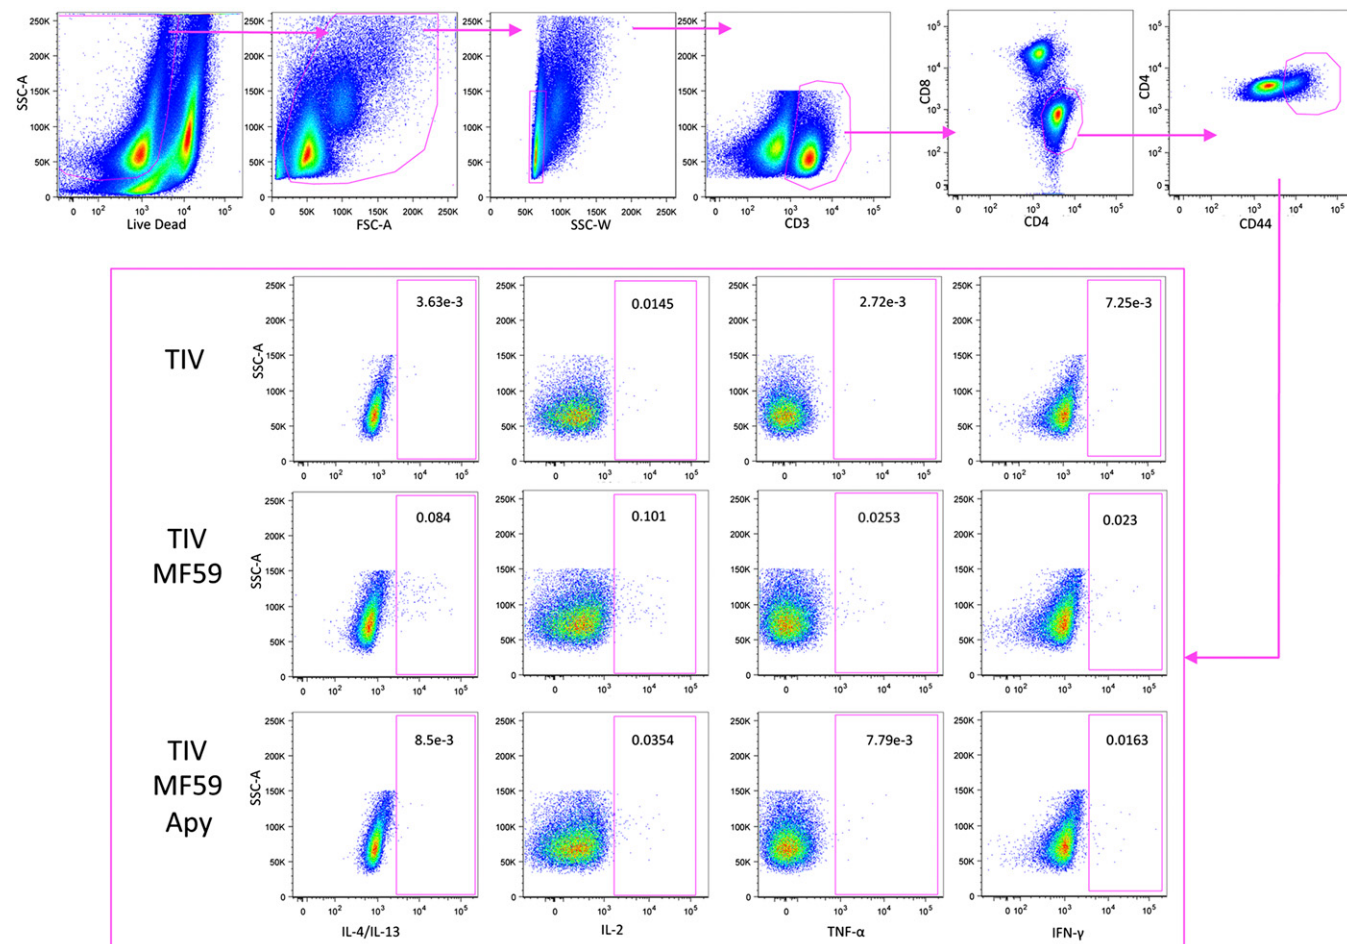

**Fig. S4.** Gating strategy of spleen-derived cells. Spleens from 4 mice per group were taken 2 wk after the first immunization, and vaccine-specific T helper cells were reactivated by in vitro stimulation. CD4<sup>+</sup>/CD44<sup>+</sup> T-helper cells were identified by the depicted gating strategy. Their individual cytokine profile was assessed by intracellular cytokine staining and FACS analysis. Cytokine-producing cells were identified (numbers inside the gate refer to cytokine-positive cells per total CD4<sup>+</sup> T cells), and multiple cytokine-expressing cells were calculated by Boolean gating. Shown are representative FACS blots from mice immunized with TIV, TIV+MF59 or TIV+MF59+apayrase, respectively.

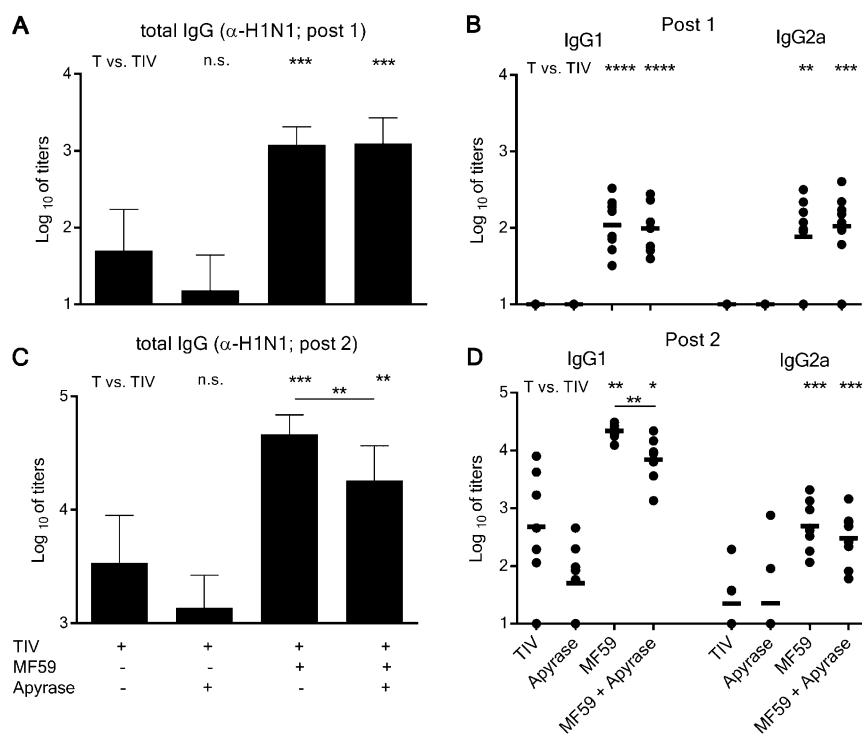



**Fig. S7.** Effect of apyrase on antibody responses induced by decreasing doses of MF59. (A–F) Mice were vaccinated with TIV and different doses of MF59 (20% vol/vol, 5% vol/vol, and 2.5% vol/vol) with or without apyrase (10 U per leg). Serum samples were drawn 2 wk after each immunization, and the total IgG antibody titers toward (A and B) H1N1/California, (C and D) H3N2/Perth, and (E and F) B/Brisbane were measured by ELISA after the prime (post 1) and the booster vaccination (post 2). Values are the mean of logarithmic titers (log 10) of eight mice per group + SD. Unpaired, two-tailed Student's *t* test (T): \**P* < 0.05, \*\**P* < 0.01, \*\*\**P* < 0.001, \*\*\*\**P* < 0.0001.

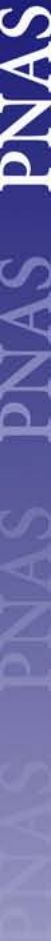

Supplement: 1319784110_pnas.201319784SI.pdf [file 1319784110_pnas.201319784SI.pdf]
